# Supplementary material
Source: PubMed Central journal article supplement (PMC3507993)
Supplement: NIHMS414528-supplement-Supp_Info_and_Data.pdf [file NIHMS414528-supplement-Supp_Info_and_Data.pdf]

S1A

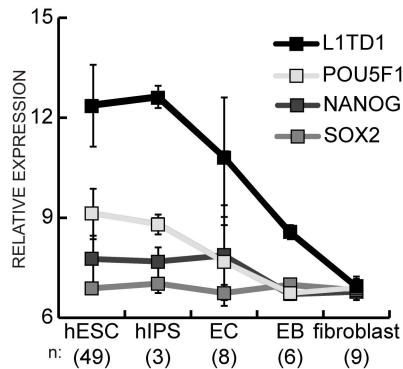

S1B

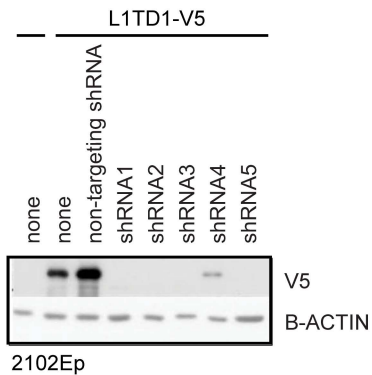

S1C

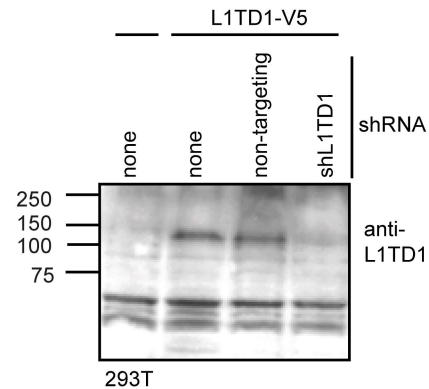

S1D

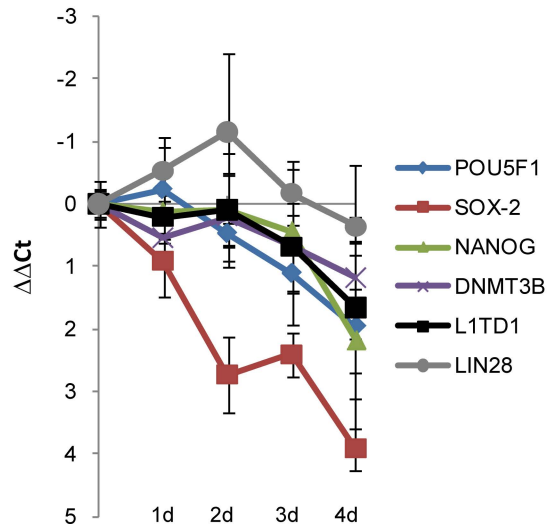

S1E

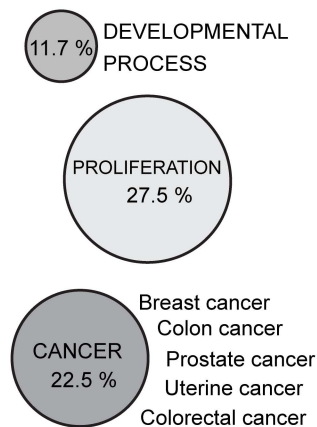

S1F

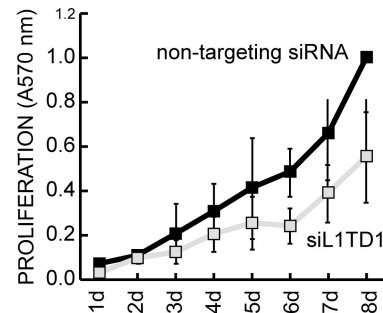

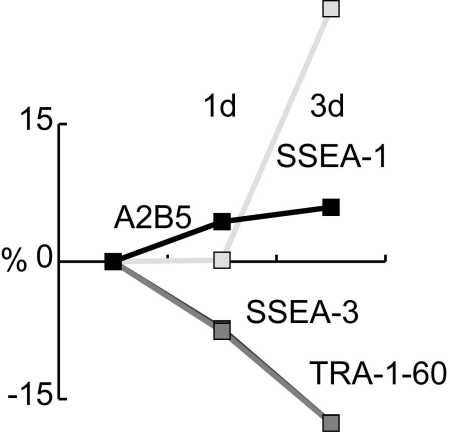

siOCT4

- SSEA-3
- TRA-1-60
- SSEA-1
- A2B5

## RRM domain

L1TD1 Homo Sapiens (701-795)

pORF1 Homo Sapiens (156-251)

\*  
N I R L I G I P E K E S Y E N - R A E D I I K E I I D E N F A E L K K G S S L E I V S A C R M P S K I D E K R L T P R H I L V K F W N S S D K E K I I R A S R E R R E I T Y Q G T R I R L T A D  
N L R L I G V P E S D V E N G T K L E N T L Q D I I Q E N F P N L A R Q A N I Q I Q E I Q R I P Q R Y S S R R A T P R H I I V R F T K V E M K E K M L R A A R E K G R V T L K G K P I R L T A D  
\*

## CTD domain

L1TD1 Homo Sapiens (796-860)

pORF1 Homo Sapiens (252-317)

\*  
L S L D T L D A R S K W S N V F K V L L E K G F N P R I L Y P A K M A F D F F G K T K V F L S I E E F R D Y V L H M P T L R E L L  
L S A E T L Q A R R E W G P I F N I L K E K N F Q P R I S Y P A K L S F I S E G E I K Y F I D K Q M L R D F V I T R P A L K E L L

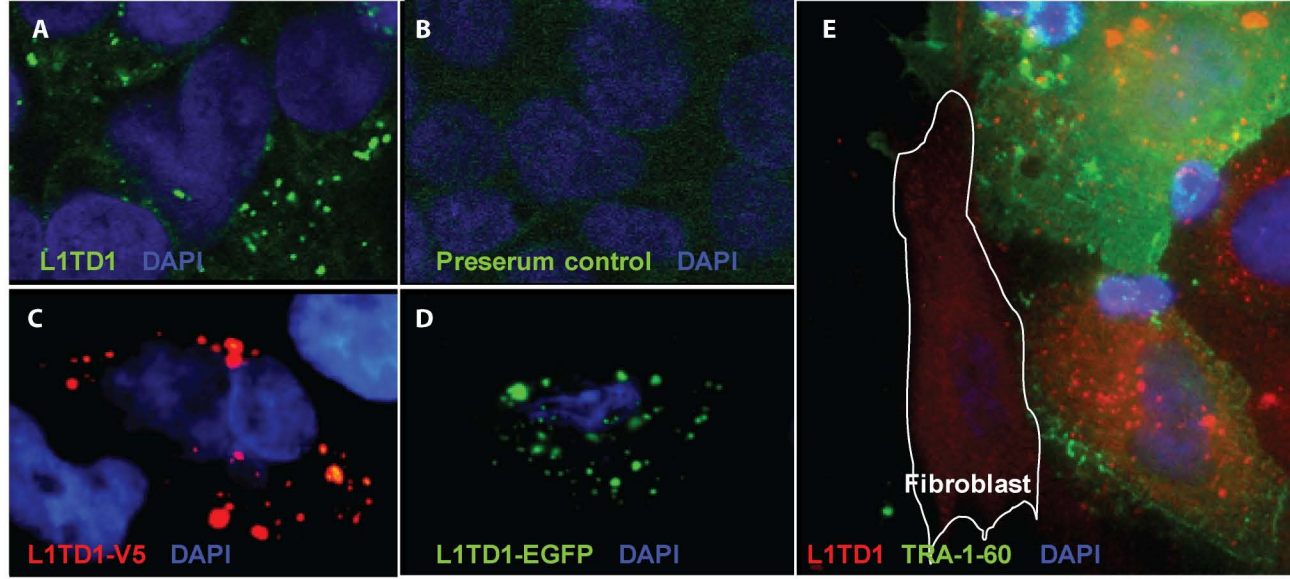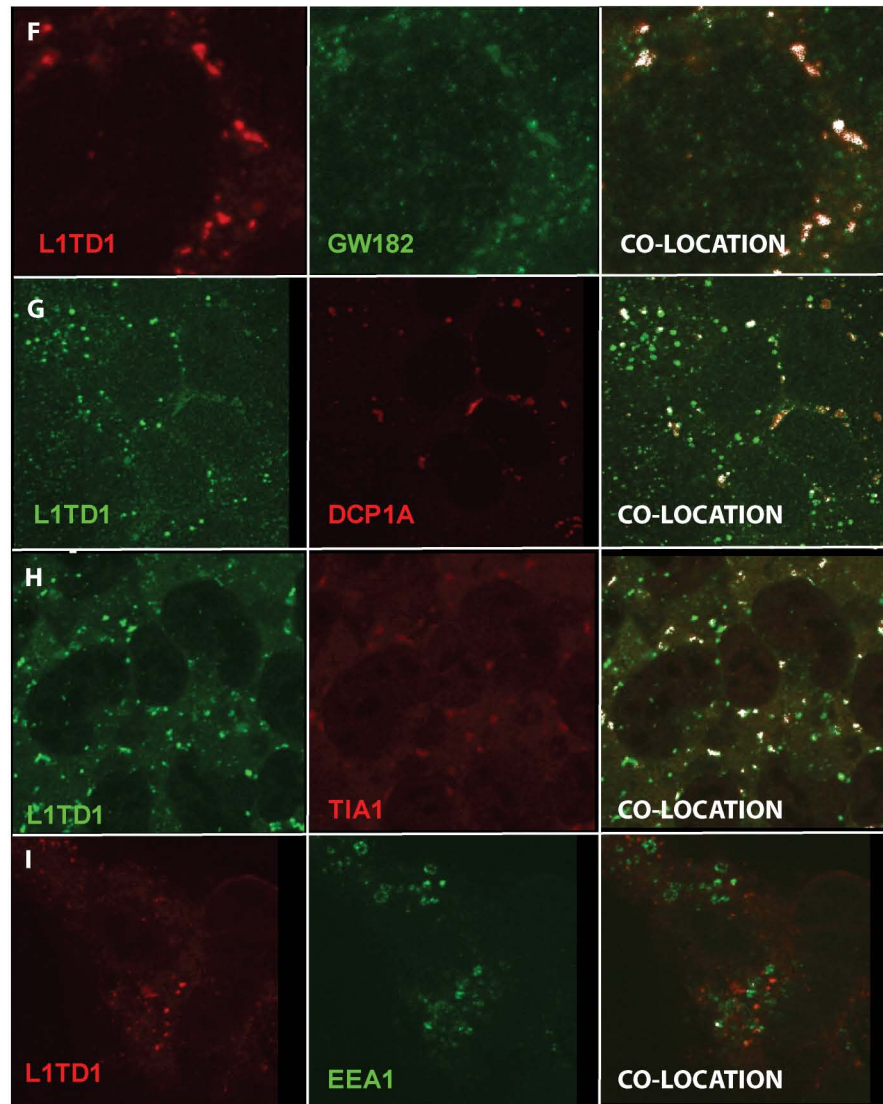

**SUPPLEMENTAL DATA (Narva, Rahkonen & Reddy et al.)**

**1**

References:

1 Khazina E, Weichenrieder O Non-LTR retrotransposons encode noncanonical RRM domains in their first open reading frame. *PROC NATL ACAD SCI U S A* 2009;106:731-736.

2 Mori S, Tanaka M, Nanba D et al. PACSIN3 binds ADAM12/meltrin alpha and up-regulates ectodomain shedding of heparin-binding epidermal growth factor-like growth factor. *J BIOL CHEM* 2003;278:46029-46034.

3 Hashimoto S, Onodera Y, Hashimoto A et al. Requirement for Arf6 in breast cancer invasive activities. *PROC NATL ACAD SCI U S A* 2004;101:6647-6652.

4 Berra E, Benizri E, Ginouves A et al. HIF prolyl-hydroxylase 2 is the key oxygen sensor setting low steady-state levels of HIF-1alpha in normoxia. *EMBO J* 2003;22:4082-4090.

**SUPPLEMENTAL DATA (Narva, Rahkonen & Reddy et al.)**

**1**

**Table1. Antibodies used in the study:**

| <b>Antibody</b>                                      | <b>Catalog number</b> | <b>Manufacturer</b>      | <b>Dilution used</b> |
|------------------------------------------------------|-----------------------|--------------------------|----------------------|
| <b>Western blotting:</b>                             |                       |                          |                      |
| L1TD1                                                | HPA028501             | Sigma                    | 1:1000               |
| OCT-4                                                | sc-9081               | Santa Cruz Biotechnology | 1:500                |
| NANOG                                                | sc-33759              | Santa Cruz Biotechnology | 1:500                |
| NANOG                                                | AF1997                | R&D Systems              | 1:1000               |
| SOX-2                                                | MAB2018               | R&D Systems              | 1:1000               |
| GAPDH                                                | 5G4                   | HyTest Ltd               | 1:20000              |
| LIN28                                                | ab46020               | Abcam                    | 1:1500               |
| DNMT3B                                               | ab13604               | Abcam                    | 1:150                |
| pSMAD1/5/8                                           | 9511L                 | Cell Signaling           | 1:200                |
| β-actin                                              | A5441                 | Sigma                    | 1:10000              |
| RHA                                                  | ab54593               | Abcam                    | 1:1000               |
| PABP                                                 | sc-32318              | Santa Cruz Biotechnology | 1:1000               |
| anti-rabbit-HRP                                      | 554021                | BD Pharmingen            | 1:10000              |
| anti-mouse-HRP                                       | sc-2005               | Santa Cruz Biotechnology | 1:10000              |
| <b>Immunocytochemistry:</b>                          |                       |                          |                      |
| anti-V5                                              | P/N 46-0705           | Invitrogen               | 1:50-200             |
| Alexa Fluor 555 conjugated goat anti-mouse IgG (H+L) | A21424                | Invitrogen               | 1:50-200             |
| Alexa Fluor 488 anti - Rabbit                        | A21441                | Invitrogen               | 1:50-200             |
| Alexa Fluor 594 anti - Rabbit                        | A11037                | Invitrogen               | 1:50-200             |
| Alexa Fluor 488 anti - mouse                         | A11001                | Invitrogen               | 1:50-200             |
| TRA1-60                                              | MAB4360               | Millipore                | 1:50-200             |

|                                   |           |                                              |                      |
|-----------------------------------|-----------|----------------------------------------------|----------------------|
| Ago2                              | 011-22033 | Wako                                         | 1:50-200             |
| LIN28                             | ab75483   | Abcam                                        | 1:50-200             |
| GW182                             | ab70522   | Abcam                                        | 1:50-200             |
| Dcp1a                             | ab57654   | Abcam                                        | 1:50-200             |
| EEA1                              | ab70521   | Abcam                                        | 1:50-200             |
| TIA1                              | ab2712    | Abcam                                        | 1:50-200             |
| <b>Flow cytometry:</b>            |           | gift from Dr. P.W. Andrews,<br>Sheffield, UK | 1:25                 |
| SSEA-1                            |           | gift from Dr. P.W. Andrews,<br>Sheffield, UK | 1:25                 |
| A2B5                              |           | gift from Dr. P.W. Andrews,<br>Sheffield, UK | 1:25                 |
| SSEA-3                            |           | gift from Dr. P.W. Andrews,<br>Sheffield, UK | 1:25                 |
| TRA-1-60                          |           | gift from Dr. P.W. Andrews,<br>Sheffield, UK | 1:25                 |
| TRA-1-81                          |           | gift from Dr. P.W. Andrews,<br>Sheffield, UK | 1:25                 |
| TRA-1-85                          |           | gift from Dr. P.W. Andrews,<br>Sheffield, UK | 1:25                 |
| SSEA-4                            |           | gift from Dr. P.W. Andrews,<br>Sheffield, UK | 1:25                 |
| TRA-2-54                          |           | gift from Dr. P.W. Andrews,<br>Sheffield, UK | 1:25                 |
| FITC Goat anti-mouse<br>IgG + IgM | M30801    | CALTAG Laboratories                          | 1:150                |
| <b>ChIP:</b>                      |           |                                              |                      |
| NANOG                             | AF1997    | R&D systems                                  | 10ug/500ug chromatin |
| OCT-4                             | SC-8628x  | Santa Cruz                                   | 10ug/500ug chromatin |

|            |         |                |                      |
|------------|---------|----------------|----------------------|
| SOX-2      | #5024s  | Cell signaling | 10ug/500ug chromatin |
| Rabbit IgG | #2729s  | Cell signaling | 10ug/500ug chromatin |
| Goat IgG   | Sc-2028 | Santa cruz     | 10ug/500ug chromatin |



**Table 2. Sequences of primers, probes, and siRNAs used in the study:**

| Purpose | Sequence                                                                                                                                                                                                                                                          |
|---------|-------------------------------------------------------------------------------------------------------------------------------------------------------------------------------------------------------------------------------------------------------------------|
| Vectors | pET-20b(+) L1TD1:<br>5'-CGCGCGCCATGGATTCTGATGTATCTACTAGTGT-3'<br>5'-CGCGCGCTCGAGAGGTATATTATCCCCAGTAA-3'                                                                                                                                                           |
|         | pEF6/V5-His-TOPO L1TD1:<br>5'-GCCATGTCTGATGTATCTACTAG-3'<br>5'-AGGTATATTATCCCCAGTAAT-3'                                                                                                                                                                           |
|         | pCAGG-EGFP L1TD1<br>5'-CGCGCGCTCGAGATGTCTGATGTATCTACTAG-3'<br>5'-CGCGCGACCGGTTGAGGTATATTATCCCCAGT-3'                                                                                                                                                              |
| RT-PCR  | EF1α:<br>probe: 5'-(FAM)-AGCGCCGGCTATGCCCTG-(TAMRA)-3'<br>sense: 5'-CTGAACCATCCAGGCCAAAT-3'<br>antisense: 5'-GCCGTGTGGCAATCCAAT-3'                                                                                                                                |
|         | L1TD1:<br>probe 69 (Roche)<br>sense: 5'-TCCCACAAAAGGAAGAAATAAATC-3'<br>antisense: 5'-GCTCTATGCTTTGAGTCTATTAGGG-3'                                                                                                                                                 |
|         | POU5F1:<br>probe 35 (Roche)<br>sense: 5'-AGCAAAACCCGGAGGAGT-3'<br>antisense: 5'-CCACATCGGCCTGTGTATATC-3'<br>probe 69 (Roche)<br>sense: 5'-AGCAAAACCCGGAGGAGT-3'<br>antisense: 5'-CCACATCGGCCTGTGTATATC-3'<br>probe 60 (Roche)<br>sense: 5'-CTTCGCAAGCCCTCATTTC-3' |

|                  |     |                                                                                                                                                                                                                                                                                                                                                                                             |
|------------------|-----|---------------------------------------------------------------------------------------------------------------------------------------------------------------------------------------------------------------------------------------------------------------------------------------------------------------------------------------------------------------------------------------------|
|                  |     | <p>antisense: 5'- GAGAAGGCGAAATCCGAAG-3'<br/>probe 52 (Roche)</p> <p>sense: 5'- CCTGTCTCCGTCACCACTCT -3'</p> <p>antisense: 5'- GGCACAAACTCCAGGTTTTTC -3'<br/>probe 69 (Roche)</p> <p>sense: 5'- CTTTGAGGCTCTGCAGCTTAG -3'</p> <p>antisense: 5'- CTGCTTTGCATATCTCCTGAAG -3'<br/>probe 57 (Roche)</p> <p>sense: 5'- CCGCCGTATGAGTTCTGTG -3'</p> <p>antisense: 5'- CAGGCTGAGAGGTCTCCAA -3'</p> |
|                  |     | <p>SOX2:</p> <p>probe 19 (Roche)</p> <p>sense: 5'-ATGGGTTCCGGTGGTCAAGT-3'</p> <p>antisense: 5'-GGAGGAAGAGGTAACCACAGG-3'</p>                                                                                                                                                                                                                                                                 |
|                  |     | <p>NANOG:</p> <p>probe 87 (Roche)</p> <p>sense: 5'- CCTGAACCTCAGCTACAAACAG -3'</p> <p>antisense: 5'- GCTATTCTTCGGCCAGTTGT -3'</p>                                                                                                                                                                                                                                                           |
|                  |     | <p>DNMT3B:</p> <p>probe 83 (Roche)</p> <p>sense: 5'-GGAAATTAGAATCAAGGAAATACGA-3'</p> <p>antisense: 5'-AATTTGTCTTGAGGCGCTTG-3'</p>                                                                                                                                                                                                                                                           |
|                  |     | <p>LIN28:</p> <p>probe 23(Roche)</p> <p>sense: 5'-AAGCGCAGATCAAAAGGAGA-3'</p> <p>antisense: 5'-CTGATGCTCTGGCAGAAGTG-3'</p>                                                                                                                                                                                                                                                                  |
| shRNAs<br>siRNAs | and | <p>siL1TD1 1: GCAAGGACGTATCAGCAATTA</p> <p>siL1TD1 2: AGGACAGAGTTTCAGCAAATA</p>                                                                                                                                                                                                                                                                                                             |

|      |                                                                                                                                                                                   |
|------|-----------------------------------------------------------------------------------------------------------------------------------------------------------------------------------|
|      | <p>siL1TD1 3: GACAGAGTTTCAGCAAATAATC</p> <p>siL1TD1 4: GCCGACCTTTCATCAGCAACA</p> <p>siL1TD1 5: GAGATGAGTCATGATGAGCATA</p>                                                         |
|      | <p>siOCT-4: AAGGAUGUGGUCCGAGUGUGG</p> <p>siSOX2: AAAACCAAGACGCUCAUGAAG</p> <p>siNANOG: AAGGGUUAAGCUGUAACAUAC</p>                                                                  |
|      | <p>nontargeting shRNA</p> <p>scr1: GCGCGCUUUGUAGGAUUCG [2]</p> <p>nontargeting siRNA sequences:</p> <p>scr2: AAUUCUCCGAACGUGUCACGU [3]</p> <p>scr3: CCUACAUCCCGAUCGAUGAUG [4]</p> |
| ChIP | <p>L1TD1 Sense:5'-AGGTGACCTTGGGGTTCAG-3'</p> <p>L1TD1 Antisense: 5'- TCCCCGAAATCGCATTC -3'</p>                                                                                    |
